# Supplementary material
Source: PubMed Central journal article supplement (PMC5581695)
Supplement: NIHMS873234-supplement-1.pdf [file NIHMS873234-supplement-1.pdf]

## Supplementary Tables

**Supplementary Table S1**

| ID | gap nt | gap a.a. | deletion span               | 5-prime bound              | 3-prime bound          | Found in                              |
|----|--------|----------|-----------------------------|----------------------------|------------------------|---------------------------------------|
| D1 | 177    | 59       | chr13:32,913,993-32,914,169 | AATTGTCCATATCTAATA         | GTTACGAGGCATTGGATGA    | solid 13x<br>liquid 7x<br>paraffin 2x |
| D2 | 66     | 22       | chr13:32,914,104-32,914,169 | AAAGACATATTTACAGACAGTTTCA  | GTTACGAGGCATTGGATGATTC | solid 1x<br>liquid 33x                |
| D3 | 27     | 9        | chr13:32,914,096-32,914,122 | AAAAAGTGAAAGACATATTTACAG   | ACAACGAGAATAAAATCAAAAA | liquid 1x                             |
| D4 | 189    | 63       | chr13:32,914,007-32,914,195 | TAATAGTAATAAATTTTGAGG      | ATATTCTTCATAACTCTCTAG  | liquid 37x                            |
| D5 | 240    | 80       | chr13:32,913,935-32,914,174 | AAGATATTTGCGTTGAGGAACCTGTG | GAGGCATTGGATGATTCAGA   | liquid 2x                             |
| D6 | 132    | 44       | chr13:32,914,031-32,914,162 | GGCCACCTGCATTTAGGATA       | GCAGTTGTTACGAGGCA      | liquid 2x                             |
| D7 | 618    | 206      | chr13:32,913,861-32,914,479 | AAAAAACACTAGTTTTTCCAAAGT   | AAGACAAGTGTTCGAAAT     | liquid 2x                             |

**Supplementary Table S1: Patient 1 reversion alleles.** NOTE: The D5 deletion reads in the liquid biopsy contain the sequence CTTGTTGAGGC. The highlighted T nucleotide must be either a G or a C to match the reference, as the consensus sequence does not indicate this patient has a SNP in the coding region that would diverge from the reference.

**Supplementary Table S2**

| source   | ID | read ID                                               |
|----------|----|-------------------------------------------------------|
| liquid   | D1 | @M02686:80:000000000-AM84R:1:1108:7654:3653 1:N:0:3   |
| liquid   | D1 | @M02686:80:000000000-AM84R:1:1119:7522:18241 1:N:0:3  |
| liquid   | D1 | @M02686:80:000000000-AM84R:1:2104:23846:11333 1:N:0:3 |
| liquid   | D1 | @M02686:80:000000000-AM84R:1:2106:8204:18124 1:N:0:3  |
| liquid   | D1 | @M02686:80:000000000-AM84R:1:2111:12616:15187 1:N:0:3 |
| liquid   | D1 | @M02686:80:000000000-AM84R:1:2112:17854:16007 1:N:0:3 |
| liquid   | D1 | @M02686:80:000000000-AM84R:1:2112:6626:11061 1:N:0:3  |
| solid    | D1 | @NS500257:40:HWFNDBGXX:1:11106:14905:12260/2          |
| solid    | D1 | @NS500257:40:HWFNDBGXX:1:12302:15336:19788/2          |
| solid    | D1 | @NS500257:40:HWFNDBGXX:1:13207:7388:13381/2           |
| solid    | D1 | @NS500257:40:HWFNDBGXX:1:21108:14113:17753            |
| solid    | D1 | @NS500257:40:HWFNDBGXX:1:21201:2306:17648             |
| solid    | D1 | @NS500257:40:HWFNDBGXX:2:12310:9465:4145/2            |
| solid    | D1 | @NS500257:40:HWFNDBGXX:2:21103:13016:2745/2           |
| solid    | D1 | @NS500257:40:HWFNDBGXX:2:21203:4589:8875/2            |
| solid    | D1 | @NS500257:40:HWFNDBGXX:2:21307:7503:19229/2           |
| solid    | D1 | @NS500257:40:HWFNDBGXX:2:22102:3548:15092/2           |
| solid    | D1 | @NS500257:40:HWFNDBGXX:3:11601:18802:1086/2           |
| solid    | D1 | @NS500257:40:HWFNDBGXX:3:13508:14730:6160/2           |
| solid    | D1 | @NS500257:40:HWFNDBGXX:4:13406:17704:10910/2          |
| solid    | D2 | @NS500257:40:HWFNDBGXX:3:12403:15743:6920/2           |
| paraffin | D1 | @U6PPT:05770:05550                                    |
| paraffin | D1 | @U6PPT:09522:09843                                    |
| liquid   | D2 | @M02686:80:000000000-AM84R:1:1101:22933:21197 1:N:0:3 |
| liquid   | D2 | @M02686:80:000000000-AM84R:1:1103:18039:20433 1:N:0:3 |
| liquid   | D2 | @M02686:80:000000000-AM84R:1:1103:20441:10714 2:N:0:3 |
| liquid   | D2 | @M02686:80:000000000-AM84R:1:1105:21902:2073 1:N:0:3  |
| liquid   | D2 | @M02686:80:000000000-AM84R:1:1106:11153:6887 2:N:0:3  |

|        |    |                                                       |
|--------|----|-------------------------------------------------------|
| liquid | D2 | @M02686:80:000000000-AM84R:1:1106:13570:13503 1:N:0:3 |
| liquid | D2 | @M02686:80:000000000-AM84R:1:1107:10488:13372 1:N:0:3 |
| liquid | D2 | @M02686:80:000000000-AM84R:1:1111:20942:22000 1:N:0:3 |
| liquid | D2 | @M02686:80:000000000-AM84R:1:1111:21409:5163 2:N:0:3  |
| liquid | D2 | @M02686:80:000000000-AM84R:1:1112:22754:17863 1:N:0:3 |
| liquid | D2 | @M02686:80:000000000-AM84R:1:1113:3650:17283 1:N:0:3  |
| liquid | D2 | @M02686:80:000000000-AM84R:1:1115:21856:12571 1:N:0:3 |
| liquid | D2 | @M02686:80:000000000-AM84R:1:1115:5584:13201 1:N:0:3  |
| liquid | D2 | @M02686:80:000000000-AM84R:1:1117:24232:15991 2:N:0:3 |
| liquid | D2 | @M02686:80:000000000-AM84R:1:1118:16133:5284 2:N:0:3  |
| liquid | D2 | @M02686:80:000000000-AM84R:1:1119:1897:15016 2:N:0:3  |
| liquid | D2 | @M02686:80:000000000-AM84R:1:1119:20661:21062 2:N:0:3 |
| liquid | D2 | @M02686:80:000000000-AM84R:1:1119:27426:7956 2:N:0:3  |
| liquid | D2 | @M02686:80:000000000-AM84R:1:2101:11686:17718 2:N:0:3 |
| liquid | D2 | @M02686:80:000000000-AM84R:1:2102:21663:11343 1:N:0:3 |
| liquid | D2 | @M02686:80:000000000-AM84R:1:2104:23131:15258 1:N:0:3 |
| liquid | D2 | @M02686:80:000000000-AM84R:1:2104:25277:14510 1:N:0:3 |
| liquid | D2 | @M02686:80:000000000-AM84R:1:2105:12585:11762 2:N:0:3 |
| liquid | D2 | @M02686:80:000000000-AM84R:1:2107:10748:16252 1:N:0:3 |
| liquid | D2 | @M02686:80:000000000-AM84R:1:2107:12484:16480 2:N:0:3 |
| liquid | D2 | @M02686:80:000000000-AM84R:1:2107:18061:13142 2:N:0:3 |
| liquid | D2 | @M02686:80:000000000-AM84R:1:2110:18776:18531 1:N:0:3 |
| liquid | D2 | @M02686:80:000000000-AM84R:1:2114:16287:6002 1:N:0:3  |
| liquid | D2 | @M02686:80:000000000-AM84R:1:2115:20435:21345 2:N:0:3 |
| liquid | D2 | @M02686:80:000000000-AM84R:1:2115:22703:9506 1:N:0:3  |
| liquid | D2 | @M02686:80:000000000-AM84R:1:2116:23100:7668 1:N:0:3  |
| liquid | D2 | @M02686:80:000000000-AM84R:1:2117:25249:18479 1:N:0:3 |
| liquid | D2 | @M02686:80:000000000-AM84R:1:2118:13822:24589 1:N:0:3 |
| liquid | D3 | M02686:80:000000000-AM84R:1:2115:4925:21573           |
| liquid | D4 | @M02686:80:000000000-AM84R:1:1101:9729:12511 1:N:0:3  |
| liquid | D4 | @M02686:80:000000000-AM84R:1:1103:15286:15301 2:N:0:3 |
| liquid | D4 | @M02686:80:000000000-AM84R:1:1104:16487:21269 2:N:0:3 |
| liquid | D4 | @M02686:80:000000000-AM84R:1:1105:20672:2299 1:N:0:3  |
| liquid | D4 | @M02686:80:000000000-AM84R:1:1105:24499:18040 1:N:0:3 |
| liquid | D4 | @M02686:80:000000000-AM84R:1:1107:21266:16376 1:N:0:3 |
| liquid | D4 | @M02686:80:000000000-AM84R:1:1108:16153:16552 1:N:0:3 |
| liquid | D4 | @M02686:80:000000000-AM84R:1:1110:2830:10510 1:N:0:3  |
| liquid | D4 | @M02686:80:000000000-AM84R:1:1111:12984:23682 1:N:0:3 |
| liquid | D4 | @M02686:80:000000000-AM84R:1:1111:13776:22186 2:N:0:3 |
| liquid | D4 | @M02686:80:000000000-AM84R:1:1111:26013:17798 1:N:0:3 |
| liquid | D4 | @M02686:80:000000000-AM84R:1:1112:4865:13911 1:N:0:3  |
| liquid | D4 | @M02686:80:000000000-AM84R:1:1114:23171:9528 2:N:0:3  |
| liquid | D4 | @M02686:80:000000000-AM84R:1:1115:15221:24977 1:N:0:3 |
| liquid | D4 | @M02686:80:000000000-AM84R:1:1116:21160:3075 2:N:0:3  |
| liquid | D4 | @M02686:80:000000000-AM84R:1:1117:21990:16743 1:N:0:3 |
| liquid | D4 | @M02686:80:000000000-AM84R:1:1119:7227:15176 1:N:0:3  |
| liquid | D4 | @M02686:80:000000000-AM84R:1:2101:17182:20816 2:N:0:3 |
| liquid | D4 | @M02686:80:000000000-AM84R:1:2101:17896:23804 2:N:0:3 |
| liquid | D4 | @M02686:80:000000000-AM84R:1:2104:16040:5196 2:N:0:3  |
| liquid | D4 | @M02686:80:000000000-AM84R:1:2104:20168:14427 2:N:0:3 |

|        |    |                                                       |
|--------|----|-------------------------------------------------------|
| liquid | D4 | @M02686:80:000000000-AM84R:1:2105:10830:12567 2:N:0:3 |
| liquid | D4 | @M02686:80:000000000-AM84R:1:2105:2400:14970 1:N:0:3  |
| liquid | D4 | @M02686:80:000000000-AM84R:1:2105:8293:12361 2:N:0:3  |
| liquid | D4 | @M02686:80:000000000-AM84R:1:2106:8309:6546 2:N:0:3   |
| liquid | D4 | @M02686:80:000000000-AM84R:1:2107:14839:15220 2:N:0:3 |
| liquid | D4 | @M02686:80:000000000-AM84R:1:2107:22940:21528 2:N:0:3 |
| liquid | D4 | @M02686:80:000000000-AM84R:1:2108:18638:19099 2:N:0:3 |
| liquid | D4 | @M02686:80:000000000-AM84R:1:2110:5304:19578 2:N:0:3  |
| liquid | D4 | @M02686:80:000000000-AM84R:1:2113:27147:16598 1:N:0:3 |
| liquid | D4 | @M02686:80:000000000-AM84R:1:2113:4579:16758 1:N:0:3  |
| liquid | D4 | @M02686:80:000000000-AM84R:1:2113:6729:13187 2:N:0:3  |
| liquid | D4 | @M02686:80:000000000-AM84R:1:2115:21006:11819 1:N:0:3 |
| liquid | D4 | @M02686:80:000000000-AM84R:1:2117:5703:16909 1:N:0:3  |
| liquid | D4 | @M02686:80:000000000-AM84R:1:2118:11255:18905 1:N:0:3 |
| liquid | D4 | @M02686:80:000000000-AM84R:1:2119:23454:4875 1:N:0:3  |
| liquid | D4 | @M02686:80:000000000-AM84R:1:2119:3803:11850 1:N:0:3  |
| liquid | D4 | @M02686:80:000000000-AM84R:1:1101:9729:12511          |
| liquid | D4 | @M02686:80:000000000-AM84R:1:1111:12984:23682         |
| liquid | D4 | @M02686:80:000000000-AM84R:1:1114:23171:9528          |
| liquid | D4 | @M02686:80:000000000-AM84R:1:2119:3803:11850          |
| liquid | D5 | @M02686:80:000000000-AM84R:1:1116:18650:13685 1:N:0:3 |
| liquid | D5 | @M02686:80:000000000-AM84R:1:2105:27012:10760 1:N:0:3 |
| liquid | D6 | @M02686:80:000000000-AM84R:1:2103:19831:15228 1:N:0:3 |
| liquid | D6 | @M02686:80:000000000-AM84R:1:2119:24234:20317 1:N:0:3 |
| liquid | D7 | @M02686:80:000000000-AM84R:1:1101:23718:2852 1:N:0:3  |
| liquid | D7 | @M02686:80:000000000-AM84R:1:2104:3080:14024 1:N:0:3  |

**Supplementary Table 2: DNA read identifiers supporting reversion alleles.** This table lists the individual reads that support deletions in *BRCA2* in Patient 1's post-talazoparib DNA. Sources are liquid (cfDNA), solid (solid tumor biopsy) or paraffin (Ion Torrent analysis of solid tumor embedded in paraffin). Deletions D1 through D7 are as shown in **Figure 1C**.

### Supplementary Table S3

|        |
|--------|
| AKT1   |
| AKT2   |
| AKT3   |
| APC    |
| AR     |
| ARID1A |
| ASXL1  |
| ATM    |
| ATR    |
| BRAF   |
| BRCA1  |
| BRCA2  |
| CCND1  |
| CDK12  |
| CDK4   |
| CDK6   |
| CDKN1B |
| CDKN2A |
| CHD1   |
| CLU    |
| CTNNB1 |

|         |
|---------|
| CUL1    |
| ERCC1   |
| ERCC2   |
| ERCC3   |
| ERCC4   |
| ERCC5   |
| ERG     |
| FANCA   |
| FANCC   |
| FANCD2  |
| FANCE   |
| FANCF   |
| FANCG   |
| FBXW7   |
| FOXA1   |
| FOXP1   |
| GNAS    |
| HSD3B1  |
| IDH1    |
| IDH2    |
| KDM6A   |
| KMT2C   |
| KMT2D   |
| KRAS    |
| MDM2    |
| MDM4    |
| MED12   |
| MET     |
| MLH1    |
| MSH2    |
| MSH6    |
| MYC     |
| NCOA2   |
| NFE2L2  |
| NKX3-1  |
| PALB2   |
| PIK3CA  |
| PIK3CB  |
| PIK3R1  |
| PTEN    |
| RAD51B  |
| RAD51C  |
| RB1     |
| RNF43   |
| RUNX1   |
| RYBP    |
| SMARCA1 |
| SPOP    |
| TMPRSS2 |
| TP53    |
| ZBTB16  |
| ZFHX3   |

**Supplementary Table S3: Gene targets of the SeqCap library used for cfDNA sequencing.**

## Supplementary Figures

### Supplementary Figure S1

talazoparib-naive (6/3/14)

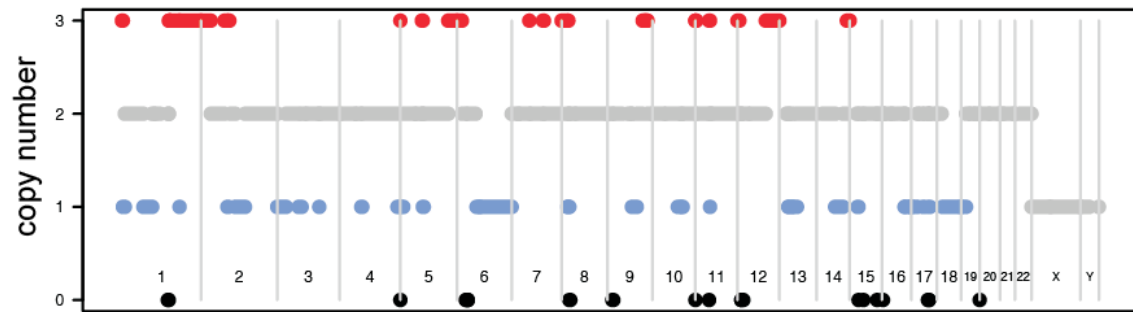

**Supplementary Figure S1: Frequent loss of heterozygosity in Patient 1's tumor DNA.** DNA copy number for Patient 1's pre-talazoparib solid tumor biopsy in comparison to Patient 1's germline DNA, drawn as two-copy loss (black), one-copy loss (blue), no alteration (grey), or single copy gain (red). Numbers at bottom indicate chromosomal location.

### Supplementary Figure S2

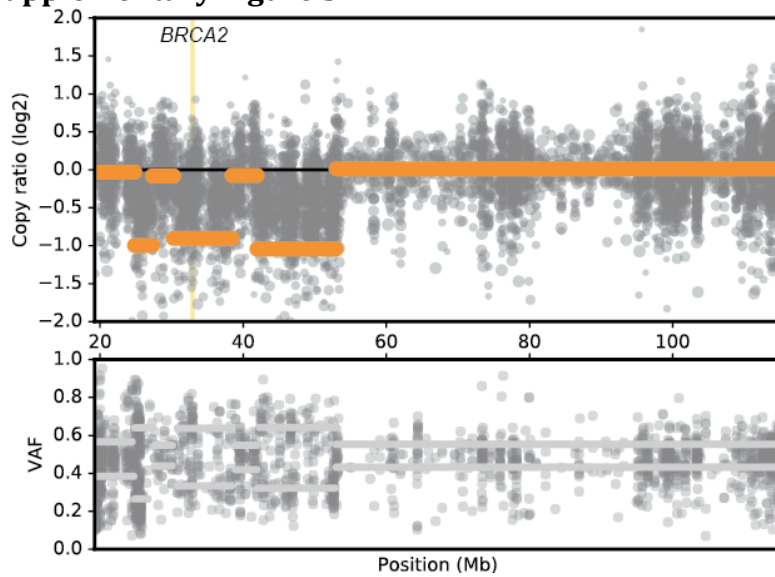

**Supplementary Figure S2: A single copy of chromosome 13 at the *BRCA2* locus is present in Patient 1's tumor DNA.** DNA copy number for chromosome 13 of Patient 1's pre-talazoparib solid tumor biopsy in comparison to Patient 1's germline DNA. Upper panel shows individual copy ratio values (grey dots), with the DNA copy number call after segmentation highlighted in orange. Position of *BRCA2* is noted with a vertical yellow line. Lower panel shows the Variant Allele Frequency (VAF) for each call; the increased distance from a VAF of 0.5 in regions with lower copy number is compatible with loss of heterozygosity.

## Supplementary Figure S3

a

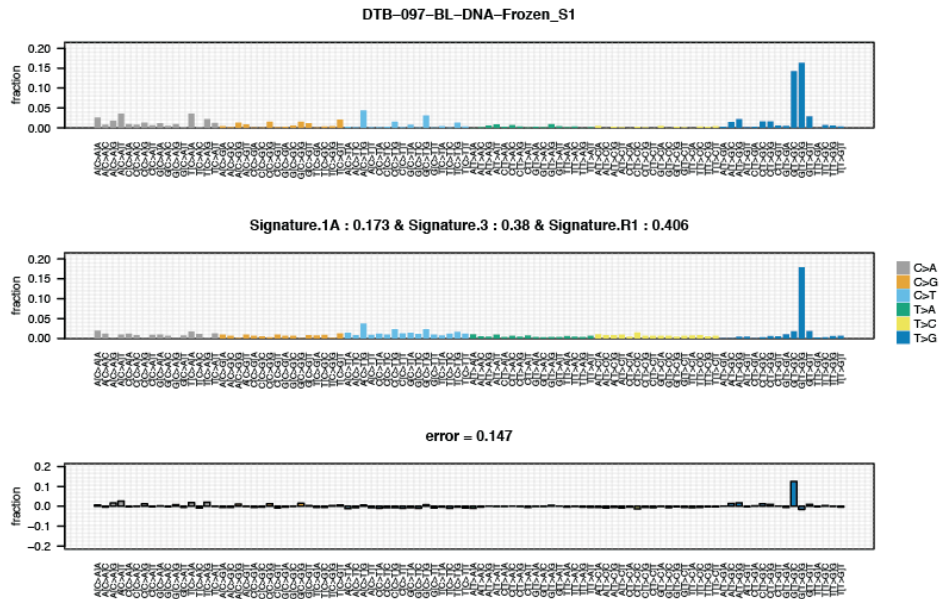

b

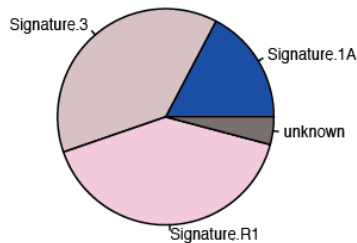

**Supplementary Figure S3: Mutation signature three is present in patient 1's solid tumor.** Patient 1's solid tumor DNA single nucleotide variations showed evidence for three signatures: signature 1A, signature 3, and signature R1. Signature 3 is the BRCA-associated signature; signature 1A is found in all tumors and is predicted to be the product of spontaneous 5-methylcytosine deamination; signature R1 failed validation in Alexandrov *et al.* Nature 2013 and is likely a sequencing artifact.

## Supplementary Figure S4

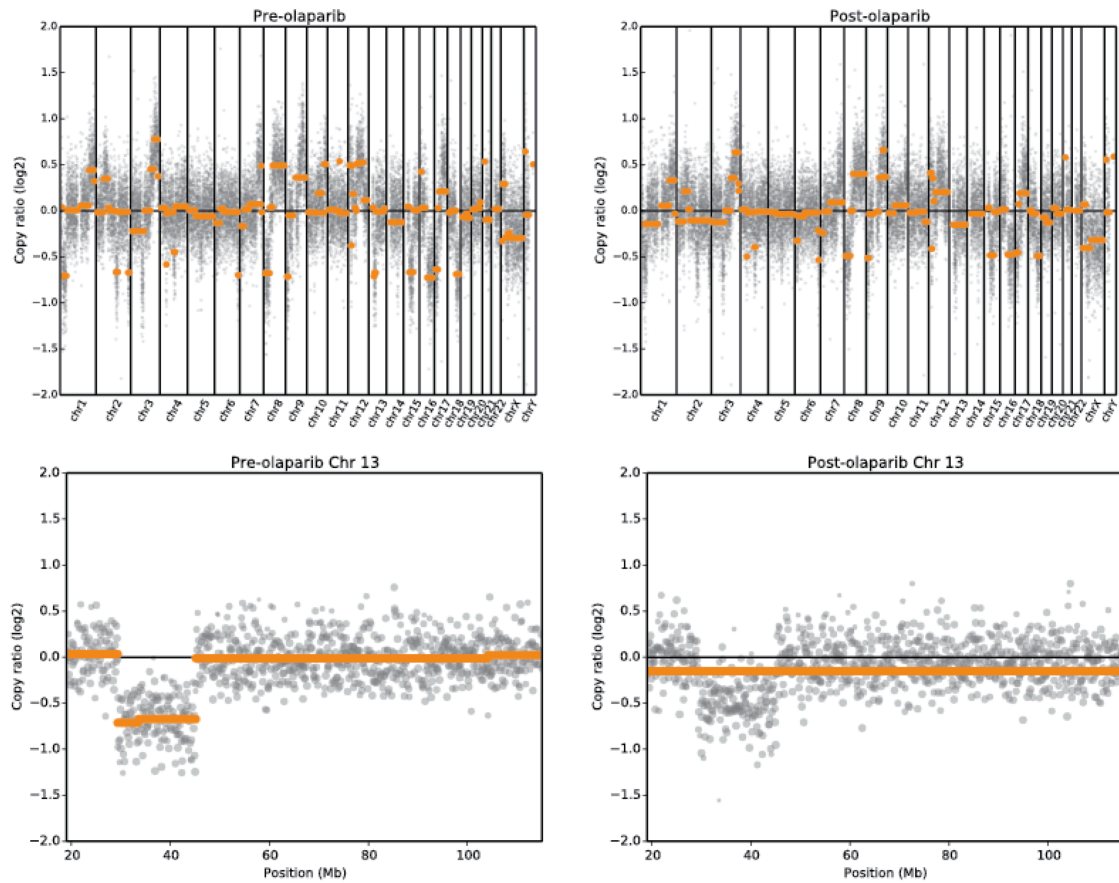

**Supplementary Figure S4: A single copy of chromosome 13 at the *BRCA2* locus is present in Patient 2's tumor DNA.** DNA copy number for chromosome 13 of Patient 2's pre-olaparib cfDNA biopsy in comparison to patient 2's germline DNA. Individual copy ratio values plotted as grey dots, with the DNA copy number call after segmentation highlighted in orange. Note that due to stringent thresholding DNACopy does not call a deletion in the post-olaparib chromosome 13 sample, it is clearly present at the same locus as the pre-olaparib sample.



### Supplementary Figure S5

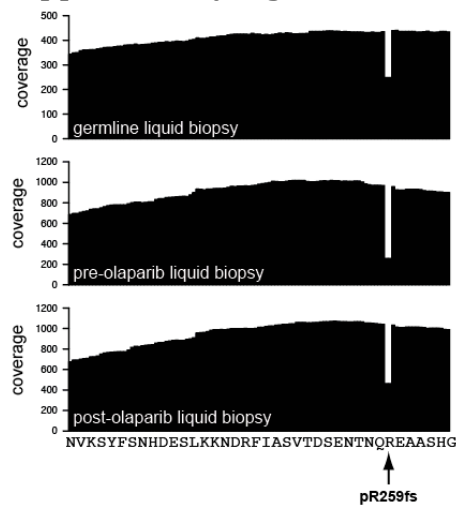

**Supplementary Figure S5: Patient 2's DNA coverage depth at residue 259.** The depth of DNA read coverage is shown in the region near p.R259fs (extracted from chromosome 13, 32,904,800-32,905,500). Letters at the bottom of the plot indicate the amino acid coded at that locus. The frequency of wild type DNA at the nucleotides coding for *BRCA2* residue 259 decreased in the pre-olaparib liquid biopsy in comparison with the germline biopsy.



## Supplementary Figure S7

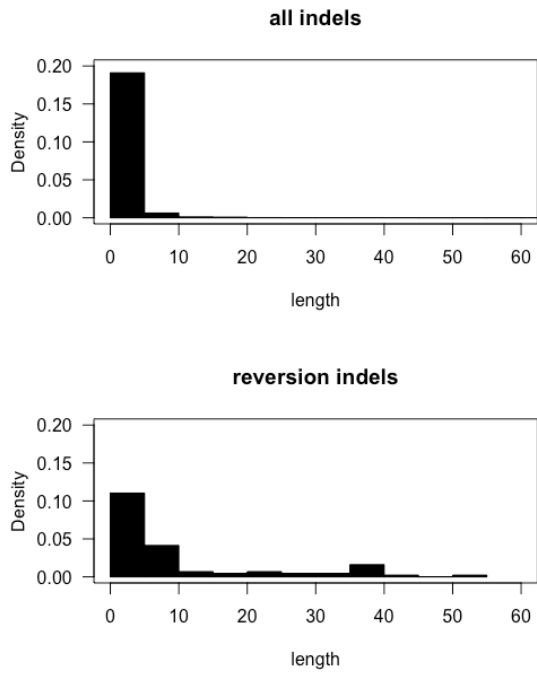

**Supplementary Figure S7: Reversion indels were significantly longer than the background distribution of indels.**

## Supplementary Methods

### Assessing Patient Two's frameshift mutations

After alignment, reads were manually inspected using the Integrated Genome Viewer. The HG19 reference sequence near the germline pR259fs frameshift includes repeated nucleotide motifs (AAAGAGAA, with underlined sequence deleted in pR259fs). Reads adjacent to this gap were generally of high quality (Phred quality score > 30). However, this repetition prompted the BWA aligner to occasionally offer three forms of alternate alignment, illustrated below:

```

REFERENCE   TCAAAGAGAAGC
pR259fs     TCAA__AGAAGC
alt 1       T AAAAAAAGC
alt 2       TC__ACAGAAGC
alt 3       TC_AAGAAAGC
alt 4       TCAAAGAG__GC
  
```

These alternate alignments were corrected to the germline pR259fs due to the following reasoning: Nucleotides highlighted in yellow always had low Phred scores (below 20, in some cases below 10) and therefore were less likely to be correct. For example, given the low quality of the highlighted A in alternate one shown above, it is reasonable to assert that the leftmost highlighted A should be a C, and the read would then be aligned as pR259fs. Given the overall high quality length of these reads outside of this region, we believed the most parsimonious interpretation for reads with alternate deletion patterns 1, 2, or 3 was that they represented incorrect alignments of the pR259fs sequence.

The BWA aligner chooses an alignment by optimizing a cost value, and alignments that have a single indel are of lower cost than those with two indels. However, BWA lacks prior knowledge that the AG dinucleotide deletion is present in the germline, even when a solution with two indels rather than one is far more plausible given this knowledge. When a reversion indel was adjacent to the repeated AG dinucleotide sequence at nucleotides 32,905,149 and 32,905,152, As a detailed supporting example, below we show an IGV browser view of the 14 indels in exon 9 that were supported by a single read and a close-up view of the first five reads. Nucleotide calls are shaded to reflect quality, with lighter shades indicating lower quality individual calls.

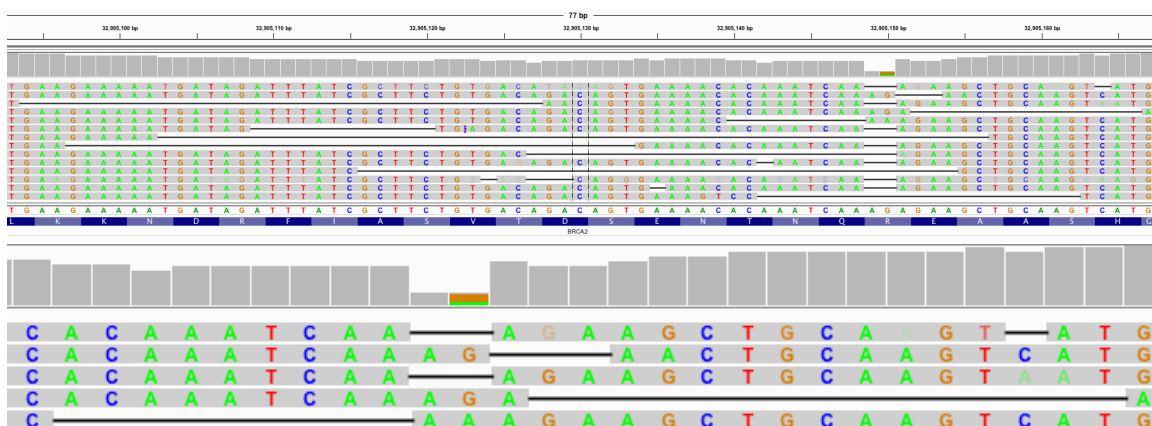

**Read 1:** The indel is 13 bp distant from germline deletion, creating no ambiguity and no need for adjustment.

**Read 2:** BWA indicates a three bp deletion that creates a mismatched A base, as this mismatch has lower cost than two deletions. Given knowledge of the germline deletion, the read is more simply and correctly assigned as:

**REFERENCE:** AAAGAGAAGC

**BWA:** AAAG--***AAC*** (mismatch in bold italic)

**CORRECTED:** AA--AGAA-C

**Read 4:** The most likely solution is AA--AGA----- given that the AGA can be assigned in either of two places.

**Read 5:** BWA assigns the AA motif to create a mismatch overlapping the germline deletion because this produces one indel rather than two, giving this solution a lower alignment penalty. However, the most likely solution (given the germline) is C-----AA--AG.

#### **Counting Patient 2's indel locations**

To create Figure 2d, aligned reads were extracted from the pre-treatment and post-treatment cfDNA BAM files using the Samtools filter parameter 1024. The bedtools *intersect* command was used to exclude reads that did not intersect the HG19 exon bounds, using bounds established by the UCSC refflat file. The physical location of each individual indel was established by a script written in Python that used the read's aligned location and CIGAR string to determine the location of the one or more indels present in that read. Indels were then binned into 50 nucleotide-wide bins using code in R, with bin occupancy plotted in R.
